# Supplementary material
Source: Springer Nature journal article supplement (https://www.springermedizin.de/resource/supplementary/12903_2011_204_MOESM8_ESM.pdf/9516352)
Supplement: MOESM8 [file 9516352]

**24 months**

*All groups follow-up*

↓  
Attended N=107  
(1 had been withdrawn by independent examiner but still attended)

Did not attend N=10

Patient chose to discontinue N=5

Withdrawn by family dentist N=1

Withdrawn by independent examiner N=3

↓  
Attended N=101  
(1 had been withdrawn by independent examiner but still attended)

Did not attend N=10

Patient chose to discontinue N=4

Withdrawn by family dentist N=0

Withdrawn by independent examiner N=5

Recruited in error N=3

↓  
Attended N=100 (1 had been withdrawn by independent examiner but still attended)

Did not attend N=7

Patient chose to discontinue N=8

Withdrawn by family dentist N =1

Withdrawn by independent examiner N=7

**Analysis**

↓  
Included in analysis N=106 or 107

Excluded from analysis N=18 or 17  
Reasons for exclusion = missing data

↓  
Included in analysis N=100 or 101

Excluded from analysis N=22 or 21  
Reasons for exclusion = missing data

↓  
Included in analysis N=99 or 100

Excluded from analysis N=23 or 22  
Reasons for exclusion = missing data
